# Supplementary material for: 5-aza-2’-deoxycytidine induces apoptosis and inhibits tumour growth in vivo of FaDu cells, a specific HPVnegative HNSCC cell line
Source: PubMed Central journal article supplement (PMC8448306; doi:10.1371/journal.pone.0253756), 2021-09-17

Caspase-3 following 5uM aza 48 hours  
Figure 4A

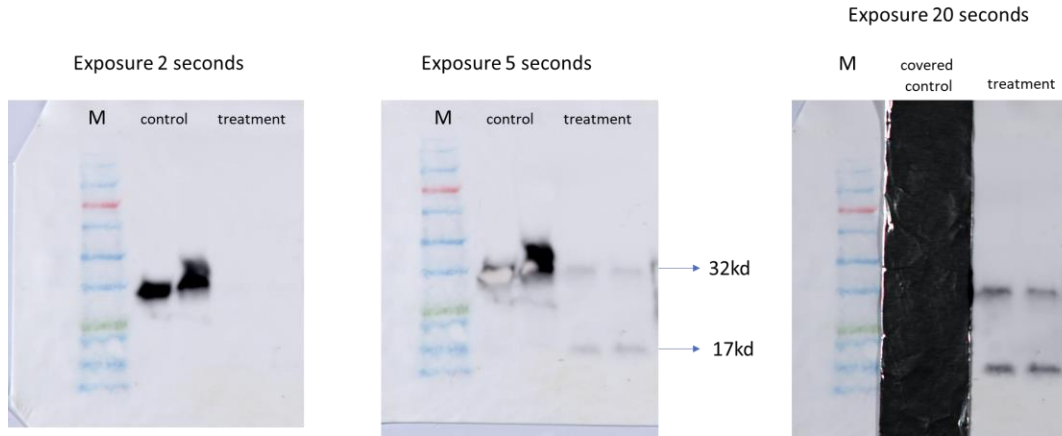

Cas 8 following 5uM aza 48 hours  
Figure 4B

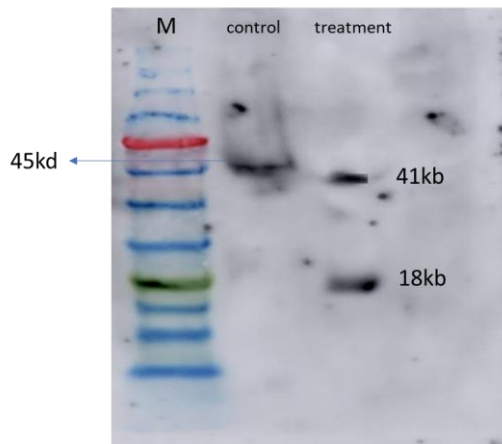

Cas 9 following 5uM aza 48 hours  
Figure 4C

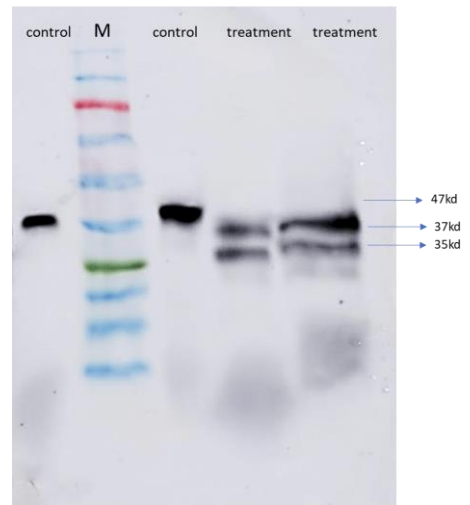

Cleaved PARP following 5uM aza 48 hours  
Figure 4D

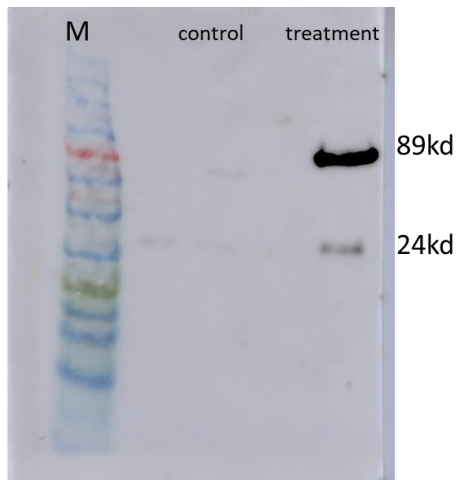

Cytochrome C following 5uM aza 48 hours  
Figure 4E

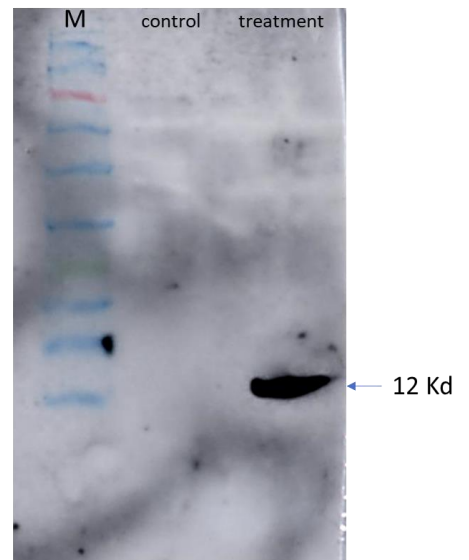

Supplement: pone.0253756.s001.pdf [file pone.0253756.s001.pdf]
